# Supplementary material for: Whole genome sequencing for USH2A-associated disease reveals several pathogenic deep-intronic variants that are amenable to splice correction
Source: PubMed Central journal article supplement (PMC9918427; doi:10.1016/j.xhgg.2023.100181), 2023-01-18
Supplement: mmc1.pdf [file mmc1.pdf]

## Supplemental information

### Whole genome sequencing for *USH2A*-associated disease reveals several pathogenic deep-intronic variants that are amenable to splice correction

Janine Reurink, Nicole Weisschuh, Alejandro Garanto, Adrian Dockery, L. Ingeborgh van den Born, Isabelle Fajardy, Lonneke Haer-Wigman, Susanne Kohl, Bernd Wissinger, G. Jane Farrar, Tamar Ben-Yosef, Fatma Kivrak Pfiffner, Wolfgang Berger, Marianna E. Weener, Lubica Dudakova, Petra Liskova, Dror Sharon, Manar Salameh, Ashley Offenheim, Elise Heon, Giorgia Giroto, Paolo Gasparini, Anna Morgan, Arthur A. Bergen, Jacqueline B. ten Brink, Caroline C.W. Klaver, Lisbeth Tranebjærg, Nanna D. Rendtorff, Sascha Vermeer, Jeroen J. Smits, Ronald J.E. Pennings, Marco Aben, Jaap Oostrik, Galuh D.N. Astuti, Jordi Corominas Galbany, Hester Y. Kroes, Milan Phan, Wendy A.G. van Zelst-Stams, Alberta A.H.J. Thiadens, Joke B.G.M. Verheij, Mary J. van Schooneveld, Suzanne E. de Bruijn, Catherina H.Z. Li, Carel B. Hoyng, Christian Gilissen, Lisenka E.L.M. Vissers, Frans P.M. Cremers, Hannie Kremer, Erwin van Wijk, and Susanne Roosing

## Table of Contents

|                                                                                                                                                                       |    |
|-----------------------------------------------------------------------------------------------------------------------------------------------------------------------|----|
| Figure S1: Effects on pre-mRNA splicing observed in minigene splice assays for thirteen variants.....                                                                 | 2  |
| Figure S2: Position of antisense oligonucleotides (AONs) and 3 nucleotide mismatch AONs (3ntMM AONs) relative to their targets. ....                                  | 4  |
| Figure S3: Differentiation efficiency of patient-derived photoreceptor precursor cells (PPCs). ....                                                                   | 5  |
| Table S1: Pre-screening methods of all samples.....                                                                                                                   | 6  |
| Table S2: All genes associated with Usher(-like) syndrome and autosomal recessive retinitis pigmentosa that were assessed in genome sequencing data of 100 cases..... | 9  |
| Table S3: Sequences of primers used to generate constructs for the minigene splice assays. ....                                                                       | 10 |
| Table S4: Sequences of primers used in qPCR. ....                                                                                                                     | 11 |
| Table S5*: All <i>USH2A</i> variants that met our variant inclusion criteria in 100 cases. ....                                                                       | 12 |
| Table S6*: All <i>USH2A</i> variants with a predicted effect on splicing.....                                                                                         | 13 |
| Table S7: Overview of observed effects on pre-mRNA splicing and consequences on protein level of 21 variants that were tested with minigene splice assays.....        | 14 |
| Table S8: Characteristics of all oligonucleotides designed in this study .....                                                                                        | 15 |
| Supplemental references .....                                                                                                                                         | 16 |

\* Table S5 and Table S6 are separate excel files

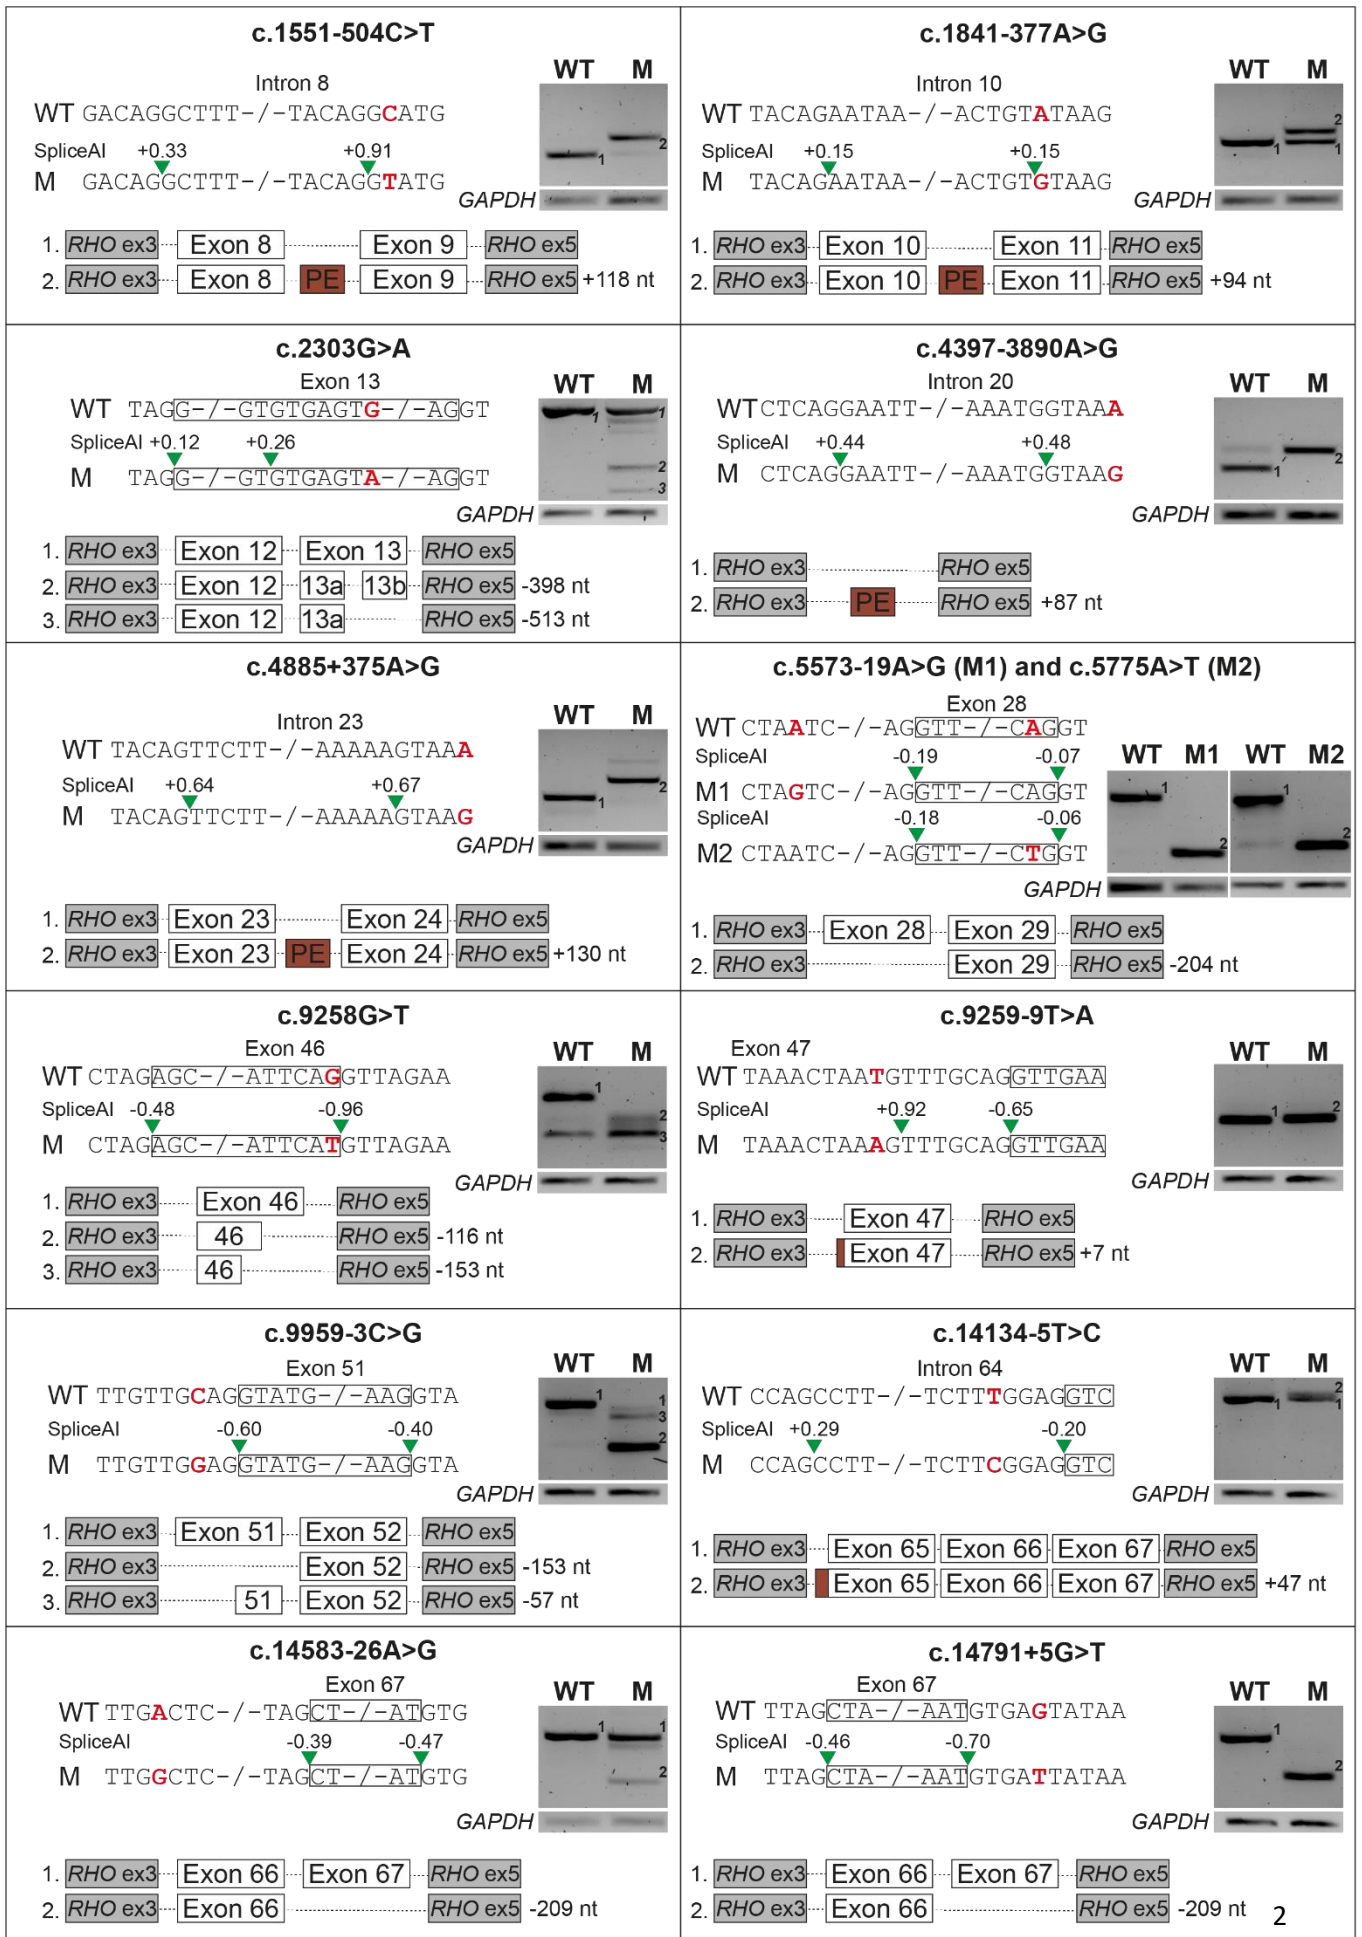

**Figure S1: Effects on pre-mRNA splicing observed in minigene splice assays for thirteen variants.** Thirteen of the 21 tested variants revealed differences in pre-mRNA splicing between mutant (M) and wildtype (WT) constructs in our minigene splice assays. The effects observed after RT-PCR are shown as well as a schematic representation of these effects including the *RHO* exons 3 and 5 that are flanking the *USH2A* genomic region cloned in the minigene. Splice predictions were obtained with SpliceAI. nt: nucleotides PE: pseudoexon

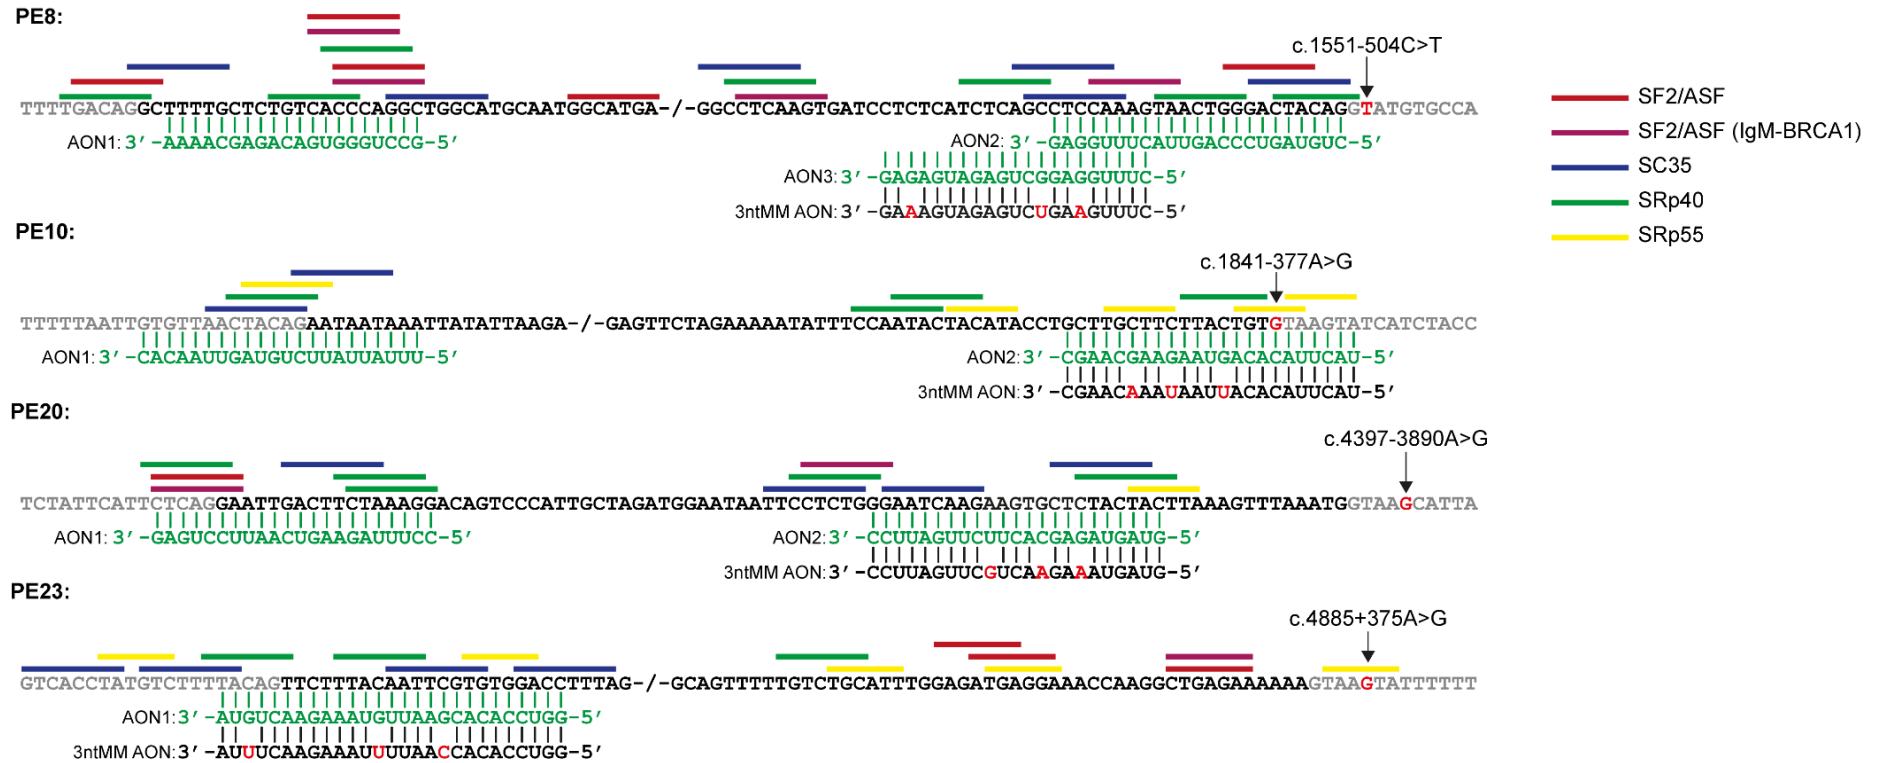

**Figure S2: Position of antisense oligonucleotides (AONs) and 3 nucleotide mismatch AONs (3ntMM AONs) relative to their targets.**

AONs were designed complementary to the splice sites or exonic splice enhancers of each specific pseudoexon (PE). The sequence of each AON is shown in green, 3ntMM AONs are in black with mismatches in red. The PE sequences that are incorporated in the mature *USH2A* transcript as a consequence of the identified deep-intronic variants are depicted in black, intronic sequences are in grey and the identified genetic variants are indicated in red. The bars above the sequences represent different types of putative exonic splice enhancers based on predictions from the ESEfinder tool<sup>1</sup> accessed from Alamut Visual Plus v1.4.

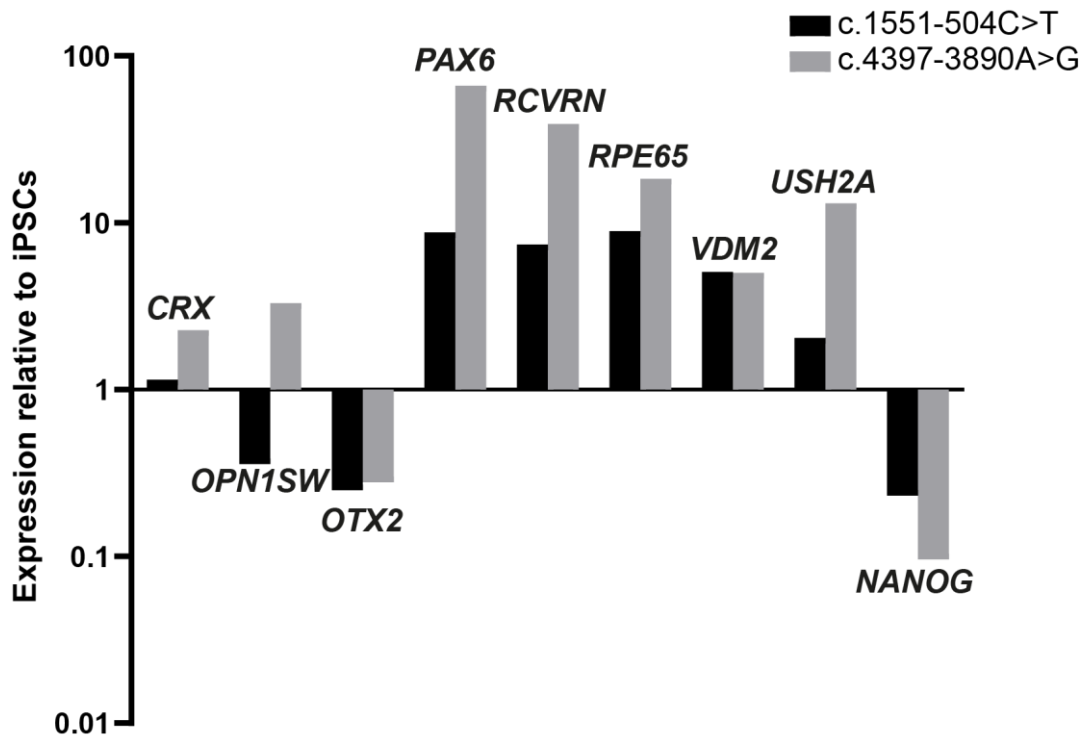

**Figure S3: Differentiation efficiency of patient-derived photoreceptor precursor cells (PPCs).**

Expression of several neuronal progenitor, photoreceptor and retinal pigment epithelium markers (*CRX*, *OPN1SW*, *OTX2*, *PAX6*, *RCVRN*, *RPE65*, *VDM2*) as well as expression of *USH2A* and a pluripotency marker (*NANOG*) were determined with RT-qPCR in induced pluripotent stem cells (iPSCs) and compared PPCs after 30 days of differentiation. Expression was normalized against *GUSB* and compared to the corresponding iPSC line at the start of differentiation (day 0) using “delta delta Ct”. As expected, pluripotency markers decreased while most of the other markers showed an increased. These data indicate that the differentiation of iPSCs towards PPCs was successful for both cell lines.

**Table S1: Pre-screening methods of all samples**

| <b>Study ID</b> | <b>Causal gene</b> | <b>Status of proband</b> | <b>Pre-screening</b>                       |
|-----------------|--------------------|--------------------------|--------------------------------------------|
| arRP1           | <i>USH2A</i>       | Possibly solved          | Molecular inversion probe based sequencing |
| arRP2           | -                  | Unsolved                 | Molecular inversion probe based sequencing |
| arRP3           | -                  | Unsolved                 | Molecular inversion probe based sequencing |
| arRP4           | <i>PQLC2</i>       | Solved                   | Molecular inversion probe based sequencing |
| arRP5           | -                  | Unsolved                 | Whole exome sequencing                     |
| arRP6           | <i>EYS</i>         | Possibly solved          | Whole exome sequencing                     |
| arRP7           | -                  | Unsolved                 | Whole exome sequencing                     |
| arRP8           | <i>USH2A</i>       | Possibly solved          | Whole exome sequencing                     |
| arRP9           | -                  | Unsolved                 | Whole exome sequencing                     |
| arRP10          | <i>USH2A</i>       | Possibly solved          | Whole exome sequencing                     |
| arRP11          | <i>USH2A</i>       | Solved                   | Target 5000 sequencing                     |
| arRP12          | -                  | Unsolved                 | Target 5000 sequencing                     |
| arRP13          | -                  | Unsolved                 | Target 5000 sequencing                     |
| arRP14          | -                  | Unsolved                 | Target 5000 sequencing                     |
| arRP15          | -                  | Unsolved                 | Whole exome sequencing                     |
| arRP16          | -                  | Unsolved                 | Whole exome sequencing                     |
| arRP17          | -                  | Unsolved                 | Targeted sequencing                        |
| arRP18          | -                  | Unsolved                 | Target 5000 sequencing                     |
| arRP19          | <i>USH2A</i>       | Solved                   | Molecular inversion probe based sequencing |
| arRP20          | <i>USH2A</i>       | Solved                   | Molecular inversion probe based sequencing |
| arRP21          | <i>USH2A</i>       | Possibly solved          | Molecular inversion probe based sequencing |
| arRP22          | <i>USH2A</i>       | Solved                   | Molecular inversion probe based sequencing |
| arRP23          | -                  | Unsolved                 | Molecular inversion probe based sequencing |
| arRP24          | <i>USH2A</i>       | Possibly solved          | Molecular inversion probe based sequencing |
| arRP25          | -                  | Unsolved                 | Molecular inversion probe based sequencing |
| arRP26          | <i>USH2A</i>       | Solved                   | Molecular inversion probe based sequencing |
| arRP27          | -                  | Unsolved                 | Molecular inversion probe based sequencing |
| arRP28          | -                  | Unsolved                 | Cegat panel sequencing                     |
| arRP29          | <i>PROM1</i>       | Possibly solved          | Cegat panel sequencing                     |
| arRP30          | -                  | Unsolved                 | Cegat panel sequencing                     |
| arRP31          | -                  | Unsolved                 | Cegat panel sequencing                     |
| arRP32          | -                  | Unsolved                 | Molecular inversion probe based sequencing |
| arRP33          | -                  | Unsolved                 | Sanger sequencing                          |
| arRP34          | <i>USH2A</i>       | Solved                   | Micro array and Sanger sequencing          |
| arRP35          | -                  | Unsolved                 | Whole exome sequencing                     |
| arRP36          | <i>USH2A</i>       | Solved                   | Whole exome sequencing                     |
| arRP37          | <i>RPE65</i>       | Solved                   | Whole exome sequencing                     |
| arRP38          | -                  | Unsolved                 | Whole exome sequencing                     |
| arRP39          | -                  | Unsolved                 | Whole exome sequencing                     |
| arRP40          | -                  | Unsolved                 | Whole exome sequencing                     |
| arRP41          | <i>USH2A</i>       | Solved                   | Whole exome sequencing                     |

|        |              |                 |                                                                                                 |
|--------|--------------|-----------------|-------------------------------------------------------------------------------------------------|
| arRP42 | <i>USH2A</i> | Solved          | Whole exome sequencing                                                                          |
| arRP43 | -            | Unsolved        | Whole exome sequencing                                                                          |
| arRP44 | -            | Unsolved        | Whole exome sequencing                                                                          |
| arRP45 | -            | Unsolved        | Whole exome sequencing                                                                          |
| arRP46 | -            | Unsolved        | Whole exome sequencing                                                                          |
| arRP47 | -            | Unsolved        | Whole exome sequencing                                                                          |
| CRD1   | -            | Unsolved        | Molecular inversion probe based sequencing                                                      |
| DFNB1  | -            | Unsolved        | Targeted sequencing                                                                             |
| DFNB2  | <i>USH2A</i> | Solved          | Targeted sequencing                                                                             |
| DFNB3  | -            | Unsolved        | Targeted sequencing                                                                             |
| USH1   | -            | Unsolved        | Molecular inversion probe based sequencing and multiplex ligation-dependent probe amplification |
| USH2   | -            | Unsolved        | Whole exome sequencing                                                                          |
| USH3   | -            | Unsolved        | Whole exome sequencing                                                                          |
| USH4   | -            | Unsolved        | Molecular inversion probe based sequencing and whole exome sequencing                           |
| USH5   | <i>USH2A</i> | Solved          | Targeted sequencing                                                                             |
| USH6   | -            | Unsolved        | Targeted sequencing                                                                             |
| USH7   | <i>USH2A</i> | Solved          | Targeted sequencing                                                                             |
| USH8   | <i>USH2A</i> | Solved          | Targeted sequencing                                                                             |
| USH9   | -            | Unsolved        | Targeted sequencing                                                                             |
| USH10  | <i>USH2A</i> | Solved          | Molecular inversion probe based sequencing                                                      |
| USH11  | <i>PEX6</i>  | Solved          | Molecular inversion probe based sequencing                                                      |
| USH12  | <i>USH2A</i> | Solved          | Targeted resequencing panel of 10 USH genes                                                     |
| USH13  | <i>USH2A</i> | Solved          | Targeted resequencing panel of 10 USH genes                                                     |
| USH14  | -            | Unsolved        | Whole exome sequencing                                                                          |
| USH15  | -            | Unsolved        | Whole exome sequencing                                                                          |
| USH16  | <i>USH2A</i> | Solved          | Whole exome sequencing                                                                          |
| USH17  | <i>USH2A</i> | Solved          | Target 5000 sequencing                                                                          |
| USH18  | -            | Unsolved        | Target 5000 sequencing                                                                          |
| USH19  | <i>USH2A</i> | Solved          | Target 5000 sequencing                                                                          |
| USH20  | <i>ARSG</i>  | Solved          | Target 5000 sequencing                                                                          |
| USH21  | -            | Unsolved        | Target 5000 sequencing                                                                          |
| USH22  | <i>USH2A</i> | Solved          | Target 5000 sequencing                                                                          |
| USH23  | <i>USH2A</i> | Possibly solved | Target 5000 sequencing                                                                          |
| USH24  | <i>USH2A</i> | Solved          | Targeted sequencing of 13 USH genes and multiplex ligation-dependent probe amplification        |
| USH25  | <i>MYO7A</i> | Solved          | Whole exome sequencing                                                                          |
| USH26  | <i>USH2A</i> | Solved          | Whole exome sequencing                                                                          |
| USH27  | -            | Unsolved        | Targeted sequencing                                                                             |
| USH28  | <i>USH2A</i> | Solved          | Treatrush sequencing                                                                            |
| USH29  | <i>USH2A</i> | Possibly solved | Treatrush sequencing                                                                            |
| USH30  | -            | Unsolved        | Treatrush sequencing                                                                            |



|       |              |                 |                                                                          |
|-------|--------------|-----------------|--------------------------------------------------------------------------|
| USH31 | <i>USH2A</i> | Solved          | Treatrush sequencing                                                     |
| USH32 | <i>USH2A</i> | Possibly solved | Cegat panel sequencing                                                   |
| USH33 | <i>USH2A</i> | Solved          | Treatrush sequencing                                                     |
| USH34 | <i>USH2A</i> | Solved          | Treatrush sequencing                                                     |
| USH35 | <i>ARSG</i>  | Solved          | Cegat panel sequencing                                                   |
| USH36 | -            | Unsolved        | Cegat panel sequencing                                                   |
| USH37 | <i>USH2A</i> | Solved          | Sanger sequencing                                                        |
| USH38 | -            | Unsolved        | Whole exome sequencing                                                   |
| USH39 | <i>USH2A</i> | Solved          | Micro array and Sanger sequencing                                        |
| USH40 | -            | Unsolved        | Whole exome sequencing                                                   |
| USH41 | <i>USH2A</i> | Solved          | Micro array and Sanger sequencing                                        |
| USH42 | <i>USH2A</i> | Solved          | Molecular inversion probe based sequencing                               |
| USH43 | -            | Unsolved        | Whole exome sequencing                                                   |
| USH44 | <i>USH2A</i> | Solved          | Whole exome sequencing                                                   |
| USH45 | -            | Unsolved        | Whole exome sequencing                                                   |
| USH46 | <i>USH2A</i> | Possibly solved | Whole exome sequencing                                                   |
| USH47 | -            | Unsolved        | Whole exome sequencing                                                   |
| USH48 | -            | Unsolved        | Whole exome sequencing                                                   |
| USH49 | <i>USH2A</i> | Possibly solved | Targeted sequencing and multiplex ligation-dependent probe amplification |

**Table S2: All genes associated with Usher(-like) syndrome and autosomal recessive retinitis pigmentosa that were assessed in genome sequencing data of 100 cases.**

|                                                 |                       |                |                |                        |                 |               |
|-------------------------------------------------|-----------------------|----------------|----------------|------------------------|-----------------|---------------|
| <b>Autosomal recessive retinitis pigmentosa</b> | <i>ABCA4</i>          | <i>AGBL5</i>   | <i>AHR</i>     | <i>ARHGEF18</i>        | <i>ARL2BP</i>   |               |
|                                                 | <i>ARL6</i>           | <i>BBS1</i>    | <i>BBS2</i>    | <i>BEST1</i>           | <i>C2orf71</i>  |               |
|                                                 | <i>C8orf37</i>        | <i>CERKL</i>   | <i>CLCC1</i>   | <i>CLRN1</i>           | <i>CNGA1</i>    |               |
|                                                 | <i>CNGB1</i>          | <i>CRB1</i>    | <i>CYP4V2</i>  | <i>DHDDS</i>           | <i>DHX38</i>    |               |
|                                                 | <i>EMC1</i>           | <i>EYS</i>     | <i>FAM161A</i> | <i>GPR125 (ADGRA3)</i> | <i>HGSNAT</i>   |               |
|                                                 | <i>IDH3B</i>          | <i>IFT140</i>  | <i>IFT172</i>  | <i>IMPG2</i>           | <i>KIAA1549</i> |               |
|                                                 | <i>KIZ</i>            | <i>LRAT</i>    | <i>MAK</i>     | <i>MERTK</i>           | <i>MVK</i>      |               |
|                                                 | <i>NEK2</i>           | <i>NEUROD1</i> | <i>NR2E3</i>   | <i>NRL</i>             | <i>PDE6A</i>    |               |
|                                                 | <i>PDE6B</i>          | <i>PDE6G</i>   | <i>POMGNT1</i> | <i>PRCD</i>            | <i>PROM1</i>    |               |
|                                                 | <i>RBP3</i>           | <i>REEP6</i>   | <i>RGR</i>     | <i>RHO</i>             | <i>RLBP1</i>    |               |
|                                                 | <i>RP1</i>            | <i>RP1L1</i>   | <i>RPE65</i>   | <i>SAG</i>             | <i>SAMD11</i>   |               |
|                                                 | <i>SLC7A14</i>        | <i>SPATA7</i>  | <i>TRNT1</i>   | <i>TTC8</i>            | <i>TULP1</i>    |               |
|                                                 | <i>ZNF408</i>         | <i>ZNF513</i>  |                |                        |                 |               |
|                                                 | <b>Usher syndrome</b> | <i>ABHD12</i>  | <i>ADGRV1</i>  | <i>ARSG</i>            | <i>CDH23</i>    | <i>CEP250</i> |
|                                                 |                       | <i>CEP78</i>   | <i>CIB2</i>    | <i>CLRN1</i>           | <i>ESPN</i>     | <i>HARS1</i>  |
| <i>MYO7A</i>                                    |                       | <i>PCDH15</i>  | <i>PEX1</i>    | <i>PEX6</i>            | <i>USH1C</i>    |               |
| <i>USH1G</i>                                    |                       | <i>WHRN</i>    |                |                        |                 |               |
| <b>Retinal modifier of Usher syndrome</b>       | <i>PDZD7</i>          |                |                |                        |                 |               |

**Table S3: Sequences of primers used to generate constructs for the minigene splice assays.**

| <b>Target variant (NM_206933.2)</b> | <b>Forward primer (5'&gt;3')</b>                       | <b>Reverse primer (5'&gt;3')</b>                      |
|-------------------------------------|--------------------------------------------------------|-------------------------------------------------------|
| c.1551-504C>T                       | GGGGACAAGTTTGTACAAAAAAGCAGGCTTCtccttcaccaccaacttc      | GGGGACCACTTTGTACAAGAAAGCTGGGTGagtgccatgctatccaaacac   |
| c.1644+7453A>G                      | GGGGACAAGTTTGTACAAAAAAGCAGGCTTCtaagaggcccaatgtgtgt     | GGGGACCACTTTGTACAAGAAAGCTGGGTGtggggcggaagagttaacat    |
| c.1841-377A>G                       | GGGGACAAGTTTGTACAAAAAAGCAGGCTTCggagatcgagaccatgtctgg   | GGGGACCACTTTGTACAAGAAAGCTGGGTGatgcaaaggaccaccgaact    |
| c.2303G>A                           | GGGGACAAGTTTGTACAAAAAAGCAGGCTTCtgattctttcaaccagatgc    | GGGGACCACTTTGTACAAGAAAGCTGGGTGtttcaggggacatagggtgg    |
| c.4396+6885T>C                      | GGGGACAAGTTTGTACAAAAAAGCAGGCTTCacatcaatggaaacgagtgacc  | GGGGACCACTTTGTACAAGAAAGCTGGGTGtggaaaggagaaaatgtaggctc |
| c.4397-3890A>G                      | GGGGACAAGTTTGTACAAAAAAGCAGGCTTCttctggcctagcagtgttg     | GGGGACCACTTTGTACAAGAAAGCTGGGTGcagggaagcaatggagaacc    |
| c.4714C>T                           | GGGGACAAGTTTGTACAAAAAAGCAGGCTTCacaattcccgcaaatccttc    | GGGGACCACTTTGTACAAGAAAGCTGGGTGtcttctttccctctggctg     |
| c.4885+375A>G                       | GGGGACAAGTTTGTACAAAAAAGCAGGCTTCgtcatcatgtgtcgagctc     | GGGGACCACTTTGTACAAGAAAGCTGGGTGaagaggaggagaagggtgcac   |
| c.5573-19A>G                        | GGGGACAAGTTTGTACAAAAAAGCAGGCTTCtaccaccatccctctgaag     | GGGGACCACTTTGTACAAGAAAGCTGGGTGcaggccacaagatcgagtgtg   |
| c.5775A>T                           | GGGGACAAGTTTGTACAAAAAAGCAGGCTTCtaccaccatccctctgaag     | GGGGACCACTTTGTACAAGAAAGCTGGGTGcaggccacaagatcgagtgtg   |
| c.6806-7599C>G                      | GGGGACAAGTTTGTACAAAAAAGCAGGCTTCcacatccctgcctcattcac    | GGGGACCACTTTGTACAAGAAAGCTGGGTGcactgtctttgctacatcccag  |
| c.8710G>A                           | GGGGACAAGTTTGTACAAAAAAGCAGGCTTCccatgccacaccaccttg      | GGGGACCACTTTGTACAAGAAAGCTGGGTGgctgtaaccaattcaaggctg   |
| c.9258G>T                           | GGGGACAAGTTTGTACAAAAAAGCAGGCTTCccaagcaagtgtccaggtc     | GGGGACCACTTTGTACAAGAAAGCTGGGTGgatgggtgttaggtgcagc     |
| c.9259-9T>A                         | GGGGACAAGTTTGTACAAAAAAGCAGGCTTCcagaatgtaggcccttgatagtg | GGGGACCACTTTGTACAAGAAAGCTGGGTGtctcctgagcttgtgatccg    |
| c.9959-3C>G                         | GGGGACAAGTTTGTACAAAAAAGCAGGCTTCaacaattcaggaccccagg     | GGGGACCACTTTGTACAAGAAAGCTGGGTGgcttgaagtgcattggagc     |
| c.12343C>T                          | GGGGACAAGTTTGTACAAAAAAGCAGGCTTCagatatggcagctccccttc    | GGGGACCACTTTGTACAAGAAAGCTGGGTGtgttccctgtattcactgtactc |
| c.14134-5T>C                        | GGGGACAAGTTTGTACAAAAAAGCAGGCTTCtgctagctccttacttccctg   | GGGGACCACTTTGTACAAGAAAGCTGGGTGtgcagaaatgatgggtgttcc   |
| c.14583-26A>G                       | GGGGACAAGTTTGTACAAAAAAGCAGGCTTCcgттаacacgtttgaggcac    | GGGGACCACTTTGTACAAGAAAGCTGGGTGgccacgggaaatgcaaatac    |
| c.14664G>A                          | GGGGACAAGTTTGTACAAAAAAGCAGGCTTCcgттаacacgtttgaggcac    | GGGGACCACTTTGTACAAGAAAGCTGGGTGgccacgggaaatgcaaatac    |
| c.14753C>T                          | GGGGACAAGTTTGTACAAAAAAGCAGGCTTCcgттаacacgtttgaggcac    | GGGGACCACTTTGTACAAGAAAGCTGGGTGgccacgggaaatgcaaatac    |
| c.14791+5G>T                        | GGGGACAAGTTTGTACAAAAAAGCAGGCTTCccagcacgatgaagactcttg   | GGGGACCACTTTGTACAAGAAAGCTGGGTGtctgggtggagggtataca     |
| <i>RHO</i> exons 3 to 5 (RT-PCR)    | cggaggtcaacaacgagtct                                   | aggtgtaggggatgggagac                                  |
| <i>GAPDH</i> control (RT-PCR)       | ctgcaccaccaactgcttag                                   | agctcagggatgaccttgc                                   |

The sequence of the Gateway® attB site is depicted in upper case, the *USH2A*-specific sequence in lower case letters.

**Table S4: Sequences of primers used in qPCR.**

| <b>Target</b>             | <b>Remark</b>                    | <b>Forward primer (5'&gt;3')</b> | <b>Reverse primer (5'&gt;3')</b> |
|---------------------------|----------------------------------|----------------------------------|----------------------------------|
| <i>GUSB</i>               | Housekeeping gene                | AGAGTGGTGCTGAGGATTGG             | CCCTCATGCTCTAGCGTGTC             |
| <i>CRX</i>                |                                  | CCCCAGTGTGGATCTGATG              | CAAACAGTGCCTCCAGCTC              |
| <i>NANOG</i>              |                                  | CCTGTGATTTGTGGCCTG               | CAGTCTCCGTGTGAGGCAT              |
| <i>OPN1SW</i>             |                                  | TTCTTCTCCAAGAGTGCTTGC            | CCTCCCACACACCATCTTC              |
| <i>OTX2</i>               |                                  | TATCTTAAGCAACCGCCTTACG           | GGAGGGGTGCAGCAAGTC               |
| <i>PAX6</i>               |                                  | GCTGCAAAGAAATAGAACATCC           | TTGGCTGCTAGTCTTTCTCG             |
| <i>RCVRN</i>              |                                  | ACACCAAGTTCTCGGAGGAG             | ACTTGGCGTAGATGCTCTGG             |
| <i>RPE65</i>              |                                  | TTACTACGCTTGACAGAGACC            | GCCCCATTGACAGAGACATAG            |
| <i>VDM2</i>               |                                  | TCAGTGTGGACACCTGTATGC            | AAGCTGTACACCGCCACAG              |
| <i>USH2A</i> Exon 8-9     | Specific for wildtype transcript | ACAACCTGAGACTGCTGTTAACC          | GACCATGGCACTGACATCTC             |
| <i>USH2A</i> exon 8-PE8   | Specific for transcript with PE  | ACAACCTGAGACTGCTGTTAACC          | CAGAGCAAAAGCCTCCCAC              |
| <i>USH2A</i> exon 12-13   | Reference for expression levels  | GCAAAGCAAACGTTATTGGGCT           | TACTACTGGCAGGGCTCACAT            |
| <i>USH2A</i> exon 20-21   | Specific for wildtype transcript | ACTTTAGCAGCAGCACCAGC             | GGAGAGGGTCCATTCAGTTC             |
| <i>USH2A</i> PE20-exon 21 | Specific for transcript with PE  | GGACAGTCCCATTGCTAGATG            | AGTTCTTGGGATTTAGCAGTGTG          |

PE: pseudoexon

**Table S5: All *USH2A* variants that met our variant inclusion criteria in 100 cases.**

See separate excel sheet

**Table S6: All *USH2A* variants with a predicted effect on splicing.**

See separate excel sheet

**Table S7: Overview of observed effects on pre-mRNA splicing and consequences on protein level of 21 variants that were tested with minigene splice assays.**

| Variant                                   | Effect on splicing                                                                                                     | Protein effect                               |
|-------------------------------------------|------------------------------------------------------------------------------------------------------------------------|----------------------------------------------|
| <b>Deep-intronic variants</b>             |                                                                                                                        |                                              |
| c.1551-504C>T                             | PE inclusion ( $\Delta$ 118 nt)                                                                                        | p.Arg517_Cys518ins*13                        |
| c.1644+7453A>G                            | No effect                                                                                                              | p.=                                          |
| c.1841-377A>G                             | 1. PE inclusion ( $\Delta$ 94 nt), 2. No effect                                                                        | p.[Gly614Aspfs*9,=]                          |
| c.4396+6885T>C                            | No effect                                                                                                              | p.=                                          |
| c.4397-3890A>G                            | PE inclusion ( $\Delta$ 87 nt)                                                                                         | p.Ala1465_Ala1466ins*5                       |
| c.4885+375A>G <sup>2</sup>                | PE inclusion ( $\Delta$ 130 nt)                                                                                        | p.Ser1629Valfs*52                            |
| c.6806-7599C>G                            | No effect                                                                                                              | p.=                                          |
| <b>Non-canonical splice site variants</b> |                                                                                                                        |                                              |
| c.5775A>T                                 | Exon 28 skipping ( $\Delta$ 204 nt)                                                                                    | p.Gly1858_Thr1925del                         |
| c.9258G>T                                 | 1. Partial exon 46 skipping ( $\Delta$ 153 nt), 2. Partial exon 46 skipping ( $\Delta$ 116 nt)                         | p.[Arg3037_Val3087del,Val3049*]              |
| c.9259-9T>A                               | Inclusion of last 7 nt of intron 46 to exon 47                                                                         | p.Val3087Phefs*4                             |
| c.9959-3C>G                               | 1. Exon 51 skipping ( $\Delta$ 224 nt), 2. Partial exon 51 skipping ( $\Delta$ 57 nt)                                  | p.[Met3321Asnfs*22,=,Gly3320_Ser3338del]     |
| c.14134-5T>C                              | 1. No effect, 2. Intron 64 inclusion ( $\Delta$ 47 nt)                                                                 | p.[=,Val4712Profs*2]                         |
| c.14791+5G>T                              | Exon 67 skipping ( $\Delta$ 209 nt)                                                                                    | p.Tyr4862Alafs*22                            |
| <b>Exonic variants</b>                    |                                                                                                                        |                                              |
| c.2303G>A                                 | 1. No effect, 2. Partial skipping of center exon 13 ( $\Delta$ 398 nt), 3. Partial exon 13 skipping ( $\Delta$ 513 nt) | p.[Cys768Tyr,Cys766Tyrfs*3,Glu767_Gly937del] |
| c.4714C>T                                 | No effect                                                                                                              | p.(Leu1572Phe)                               |
| c.8710G>A                                 | No effect                                                                                                              | p.(Val2904Ile)                               |
| c.12343C>T                                | No effect                                                                                                              | p.(Arg4115Cys)                               |
| c.14664G>A                                | No effect                                                                                                              | p.(Thr4888=)                                 |
| c.14753C>T                                | No effect                                                                                                              | p.(Thr4918Met)                               |
| <b>Branchpoint variants</b>               |                                                                                                                        |                                              |
| c.5573-19A>G                              | Exon 28 skipping ( $\Delta$ 204 nt)                                                                                    | p.Gly1858_Thr1925del                         |
| c.14583-26A>G                             | 1. No effect, 2. Exon 67 skipping ( $\Delta$ 209 nt)                                                                   | p.[=,Tyr4862Alafs*22]                        |

nt: nucleotide; PE: pseudoexon

**Table S8: Characteristics of all oligonucleotides designed in this study**

| Oligonucleotide             | Sequence (3'>5')            | Target variant                                    | Coordinates of pseudoexon (hg19) | Length (nt) | GC-content (%) |
|-----------------------------|-----------------------------|---------------------------------------------------|----------------------------------|-------------|----------------|
| AON1 USH2A PE8              | GCCUGGGUGACAGAGCAAAA        | c.1551-504C>T<br>(p.Arg517_Cys518ins*13)          | chr1:216495824-<br>216495941     | 20          | 55             |
| AON2 USH2A PE8 <sup>^</sup> | CUGUAGUCCCAGUUACUUUGGAG     |                                                   |                                  | 23          | 48             |
| AON3 USH2A PE8              | CUUUGGAGGCUGAGAUGAGAG       |                                                   |                                  | 21          | 52             |
| SON USH2A PE8               | CUCUCAUCUCAGCCUCCAAAG       |                                                   |                                  | 21          | 52             |
| AON3 3ntMM USH2A PE8        | CUUUGaAGuCUGAGAUGAaAG       |                                                   |                                  | 21          | 38             |
| AON1 USH2A PE10             | UUUAUUUUCUGUAGUUAACAC       | c.1841-377A>G<br>(p.[Thr613_Gly614ins*9,=])       | chr1:216463130-<br>216463223     | 22          | 23             |
| AON2 USH2A PE10             | UACUUACACAGUAAGAAGCAAGC     |                                                   |                                  | 23          | 39             |
| AON2 3ntMM USH2A PE10       | UACUUACACAUAAuAAaCAAGC      |                                                   |                                  | 23          | 26             |
| SON USH2A PE10*             | GUAGUAAAGAACUGCUUGAUUCC     |                                                   |                                  | 23          | 39             |
| AON1 USH2A PE20             | CCUUUAGAAGUCAAUUCCUGAG      | c.4397-3890A>G<br>(p.Ala1465_Ala1466ins*5)        | chr1:216352719-<br>216352805     | 22          | 41             |
| AON2 USH2A PE20             | GUAGUAGAGCACUUCUUGAUUCC     |                                                   |                                  | 23          | 43             |
| SON USH2A PE20              | GGAAUCAAGAAGUGCUCUACUAC     |                                                   |                                  | 23          | 43             |
| AON2 3ntMM USH2A PE20*      | GUAGUAaAGaACUgCUUGAUUCC     |                                                   |                                  | 23          | 39             |
| AON1 USH2A PE23             | GGUCCACACGAAUUGUAAAGAACUGUA | c.4885+375A>G <sup>2</sup><br>(p.Ser1629Valfs*52) | chr1:216261985-<br>216262114     | 27          | 41             |
| SON USH2A PE23*             | GUAGUAAAGAACUGCUUGAUUCC     |                                                   |                                  | 27          | 33             |
| AON1 3ntMM USH2A PE23       | GGUCCACACcAAUUuUAAAGAACUuUA |                                                   |                                  | 23          | 39             |

Oligonucleotides labeled with an asterisk are the same. For 3 nucleotide mismatch antisense oligonucleotides (3ntMM AONs), lowercase nucleotides are mismatches. PE: pseudoexon; SON: sense oligonucleotide; <sup>^</sup>: many off-target binding regions predicted for this oligonucleotide



### Supplemental references

1. Cartegni, L., Wang, J., Zhu, Z., Zhang, M. Q. & Krainer, A. R. ESEfinder: A web resource to identify exonic splicing enhancers. *Nucleic Acids Res* 31, 3568-3571, doi:10.1093/nar/gkg616 (2003).
2. Mansard, L. et al. The Study of a 231 French Patient Cohort Significantly Extends the Mutational Spectrum of the Two Major Usher Genes MYO7A and USH2A. *Int J Mol Sci* 22, doi:10.3390/ijms222413294 (2021).
3. Liquori, A. et al. Whole USH2A Gene Sequencing Identifies Several New Deep Intronic Mutations. *Hum Mutat* 37, 184-193, doi:10.1002/humu.22926 (2016).
4. Vaché, C. *et al.* Usher syndrome type 2 caused by activation of an USH2A pseudoexon: implications for diagnosis and therapy. *Hum Mutat* 33, 104-108, doi:10.1002/humu.21634 (2012).
5. Lenassi, E. et al. A detailed clinical and molecular survey of subjects with nonsyndromic USH2A retinopathy reveals an allelic hierarchy of disease-causing variants. *Eur J Hum Genet* 23, 1318-1327, doi:10.1038/ejhg.2014.283 (2015).
